# Supplementary material for: “In Situ” Formation of Zn Anode from Bimetallic Cu-Zn Alloy (Brass) for Dendrite-Free Operation of Zn-Air Rechargeable Battery
Source: MDPI journal article supplement (doi:10.3390/batteries8110212), 2022-11-03
Supplement: s1 [file s1]

## Supporting Information

### **„In situ” formation of Zn anode from bimetallic Cu-Zn alloy (brass) for dendrite-free operation of Zn-air rechargeable battery**

Tibor Nagy<sup>a</sup>, Lajos Nagy<sup>a</sup>, Zoltán Erdélyi<sup>b</sup>, Eszter Baradács<sup>b,c</sup>, György Deák<sup>a</sup>, Miklós Zsuga<sup>a</sup>, Sándor Kéki<sup>a,\*</sup>

<sup>a</sup>Department of Applied Chemistry, Faculty of Sciences and Technology, University of Debrecen, Egyetem tér 1, Debrecen H-4032, Hungary

<sup>b</sup>Department of Solid State Physics, Faculty of Sciences and Technology, University of Debrecen, P.O. Box 400, Debrecen H-4002, Hungary

<sup>c</sup>Department of Environmental Physics, Faculty of Sciences and Technology, University of Debrecen, Poroszlai u. 6, Debrecen H-4026, Hungary

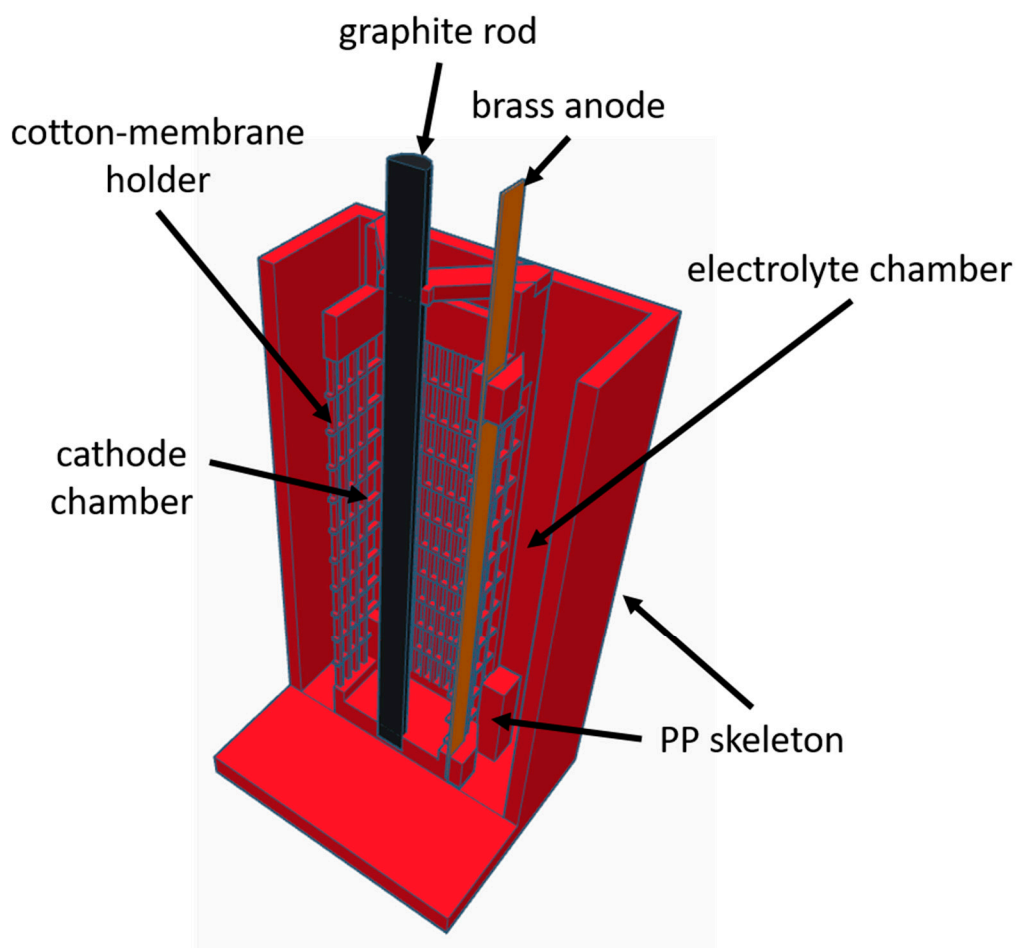

**Figure S1.** The exploded-view of the 3D-printed battery
