# Supplementary material for: “In Situ” Formation of Zn Anode from Bimetallic Cu-Zn Alloy (Brass) for Dendrite-Free Operation of Zn-Air Rechargeable Battery
Source: MDPI journal article supplement (doi:10.3390/batteries8110212), 2022-11-03
Supplement: s1 [file s1]

Archive with 1 entries (1 files):
- batteries-1960180-supplementary.pdf
